# Supplementary material for: Serum and Tissue Zinc in Epithelial Malignancies: A Meta-Analysis
Source: PLoS One. 2014 Jun 18;9(6):e99790. doi: 10.1371/journal.pone.0099790 (PMC4062461; doi:10.1371/journal.pone.0099790)
Supplement: Table S1 — Meta-regression analysis of overall results using mixed effects model (unrestricted maximum likehood). SMD, standardized mean difference. (XLSX) [file pone.0099790.s002.xlsx]

## Sheet: Table 3 meta-regression
	Factor	No. of studies	Slope (SMD)	95 % CI of SMD	Model Q	Residual Q
TNM Stage
	serum	15	0.162461	-1.71 to 2.04	0.0287687	15.2556
	tissue	10	insufficient data set
Tumor grade
	serum	6	-1.67148	-3.95 to 0.6	2.07313	6.06444
	tissue	6	-0.711807	-3.82 to 2.39	0.202075	6.04549
Age of patients
	serum	30	0.00402827	-0.02 to 0.03	0.0757939	65.5492
	tissue	29	-0.315648	-1.89 to 1.26	0.154089	30.9797
Study published
	serum study published	106	-0.00946176	-0.04 to 0.03	0.275868	147.97
	tissue study published	90	-0.0064144	-0.25 to 0.23	0.00275165	125.597
